# Supplementary material
Source: Springer Nature journal article supplement (https://www.springermedizin.de/resource/supplementary/13027_2009_152_MOESM1_ESM.pdf/25656576)

**1 2 3 4 5 6 7 8 9 10 11 12 K**

**99 bp**

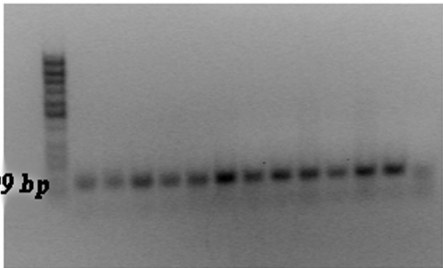

Supplement: MOESM1 [file 25656576]
